# Supplementary material for: Dendritic (phosphine)gold(i) thiolate complexes: assessment of the molecular size through PGSENMR studies
Source: Royal Society of Chemistry journal article supplement (doi:10.1039/b812500g), 2008-11-12

## Dendritic (Phosphine)gold(I) Thiolate Complexes: Assessment of the Molecular Size through PGSE NMR Studies.

Eduardo J. Fernández,<sup>a</sup> Antonio Laguna,<sup>b</sup> Miguel Monge,<sup>\*a</sup> Manuel Montiel,<sup>a</sup> M. Elena Olmos<sup>a</sup>, Javier Pérez,<sup>a</sup> and Eva Sánchez-Forcada<sup>a</sup>

<sup>a</sup> Departamento de Química, Universidad de La Rioja, Grupo de Síntesis Química de La Rioja, UA-CSIC. Complejo Científico-Tecnológico, 26004-Logroño, SPAIN. Fax: +34 941 299 621. Tel: +34 941 299 644; E-mail: miguel.monge @unirioja.es

<sup>b</sup> Departamento de Química Inorgánica, Instituto de Ciencia de Materiales de Aragón, Universidad de Zaragoza-CSIC, 50009-Zaragoza, SPAIN.

### ELECTRONIC SUPPLEMENTARY INFORMATION

#### PGSE-NMR RESULTS

The next figures and tables show the results obtained in the PGSE-NMR experiments. The figures show the curve fit using the double stimulated echo pulse sequence in which the dependence of the resonance intensity  $I$  on a constant waiting time and on a varied gradient strength  $G$  is described by the equation:

$$I = I_0 \exp\left(-D_i(2\pi\gamma\delta\cdot G)^2\left(\Delta - \frac{\delta}{3}\right)\cdot 10^4\right)$$

## Compound EN-G0-(PPh<sub>2</sub>)<sub>4</sub> (1)

INTENSITY fit : Diffusion : Variable Gradient :

$$I=I[0]*\exp(-D*\text{SQR}(2*\text{PI}*\text{gamma}*\text{Gi}*\text{LD})*(\text{BD}-\text{LD}/3)*1e4)$$

32 points for Peak 1, Peak Point = 3.312 ppm

Converged after 36 iterations!

Results Comp. 1

I[0] = 9.975e-001  
 Diff Con. = 6.908e-010 m<sup>2</sup>/s  
 Gamma = 4.258e+003 Hz/G  
 Little Delta = 2.000m  
 Big Delta = 197.230m

RSS = 2.348e-003

SD = 8.565e-003

| Point | Gradient   | Expt       | Calc       | Difference  |
|-------|------------|------------|------------|-------------|
| 1     | 6.740e-001 | 1.000e+000 | 9.957e-001 | -4.295e-003 |
| 2     | 1.686e+000 | 9.898e-001 | 9.865e-001 | -3.247e-003 |
| 3     | 2.697e+000 | 9.962e-001 | 9.697e-001 | -2.656e-002 |
| 4     | 3.709e+000 | 9.481e-001 | 9.455e-001 | -2.569e-003 |
| 5     | 4.720e+000 | 9.086e-001 | 9.147e-001 | 6.122e-003  |
| 6     | 5.732e+000 | 8.715e-001 | 8.779e-001 | 6.358e-003  |
| 7     | 6.743e+000 | 8.348e-001 | 8.359e-001 | 1.062e-003  |
| 8     | 7.755e+000 | 7.810e-001 | 7.895e-001 | 8.546e-003  |
| 9     | 8.766e+000 | 7.383e-001 | 7.399e-001 | 1.584e-003  |
| 10    | 9.778e+000 | 6.735e-001 | 6.878e-001 | 1.436e-002  |
| 11    | 1.079e+001 | 6.246e-001 | 6.344e-001 | 9.830e-003  |
| 12    | 1.180e+001 | 5.830e-001 | 5.805e-001 | -2.542e-003 |
| 13    | 1.281e+001 | 5.211e-001 | 5.270e-001 | 5.842e-003  |
| 14    | 1.382e+001 | 4.637e-001 | 4.746e-001 | 1.085e-002  |
| 15    | 1.484e+001 | 4.305e-001 | 4.240e-001 | -6.464e-003 |
| 16    | 1.585e+001 | 3.738e-001 | 3.758e-001 | 2.031e-003  |
| 17    | 1.686e+001 | 3.370e-001 | 3.305e-001 | -6.553e-003 |
| 18    | 1.787e+001 | 2.862e-001 | 2.883e-001 | 2.152e-003  |
| 19    | 1.888e+001 | 2.485e-001 | 2.495e-001 | 1.006e-003  |
| 20    | 1.989e+001 | 2.129e-001 | 2.142e-001 | 1.343e-003  |
| 21    | 2.090e+001 | 1.775e-001 | 1.825e-001 | 4.930e-003  |
| 22    | 2.192e+001 | 1.533e-001 | 1.542e-001 | 9.441e-004  |
| 23    | 2.293e+001 | 1.405e-001 | 1.293e-001 | -1.119e-002 |
| 24    | 2.394e+001 | 1.147e-001 | 1.075e-001 | -7.176e-003 |
| 25    | 2.495e+001 | 1.050e-001 | 8.871e-002 | -1.624e-002 |
| 26    | 2.596e+001 | 8.113e-002 | 7.263e-002 | -8.499e-003 |
| 27    | 2.697e+001 | 5.836e-002 | 5.897e-002 | 6.135e-004  |
| 28    | 2.798e+001 | 5.117e-002 | 4.752e-002 | -3.651e-003 |
| 29    | 2.900e+001 | 4.138e-002 | 3.798e-002 | -3.403e-003 |
| 30    | 3.001e+001 | 3.631e-002 | 3.012e-002 | -6.191e-003 |
| 31    | 3.102e+001 | 3.688e-002 | 2.369e-002 | -1.319e-002 |
| 32    | 3.203e+001 | 2.942e-002 | 1.849e-002 | -1.093e-002 |

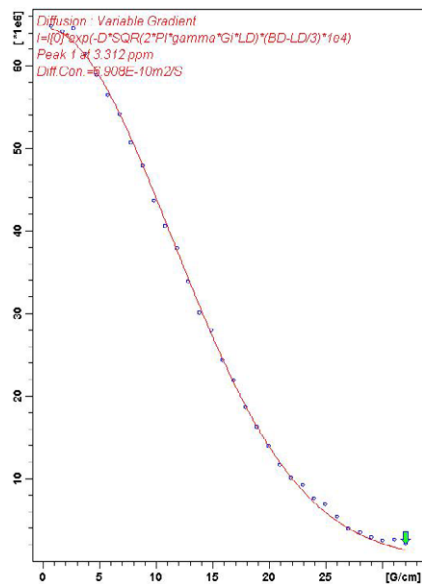

## Compound DAB-G0-(PPh<sub>2</sub>)<sub>4</sub> (2)

INTENSITY fit : Diffusion : Variable Gradient :

$$I=I[0]*\exp(-D*SQR(2*PI*\gamma*LD)*(BD-LD/3)*1e4)$$

27 points for Peak 1, Peak Point = 3.714 ppm

Converged after 37 iterations!

Results Comp. 1

I[0] = 1.003e+000  
 Diff Con. = 6.489e-010 m<sup>2</sup>/s  
 Gamma = 4.258e+003 Hz/G  
 Little Delta = 2.000m  
 Big Delta = 197.230m

RSS = 2.769e-003

SD = 1.013e-002

| Point | Gradient   | Expt       | Calc       | Difference  |
|-------|------------|------------|------------|-------------|
| 1     | 6.740e-001 | 1.000e+000 | 1.001e+000 | 8.565e-004  |
| 2     | 1.686e+000 | 9.980e-001 | 9.922e-001 | -5.817e-003 |
| 3     | 2.697e+000 | 9.871e-001 | 9.762e-001 | -1.081e-002 |
| 4     | 3.709e+000 | 9.624e-001 | 9.534e-001 | -9.002e-003 |
| 5     | 4.720e+000 | 9.254e-001 | 9.242e-001 | -1.217e-003 |
| 6     | 5.732e+000 | 8.930e-001 | 8.892e-001 | -3.862e-003 |
| 7     | 6.743e+000 | 8.627e-001 | 8.492e-001 | -1.358e-002 |
| 8     | 7.755e+000 | 7.951e-001 | 8.049e-001 | 9.791e-003  |
| 9     | 8.766e+000 | 7.447e-001 | 7.573e-001 | 1.260e-002  |
| 10    | 9.778e+000 | 6.990e-001 | 7.071e-001 | 8.065e-003  |
| 11    | 1.079e+001 | 6.534e-001 | 6.554e-001 | 1.977e-003  |
| 12    | 1.180e+001 | 5.858e-001 | 6.029e-001 | 1.711e-002  |
| 13    | 1.281e+001 | 5.413e-001 | 5.506e-001 | 9.261e-003  |
| 14    | 1.382e+001 | 4.821e-001 | 4.990e-001 | 1.687e-002  |
| 15    | 1.585e+001 | 4.019e-001 | 4.008e-001 | -1.063e-003 |
| 16    | 1.686e+001 | 3.611e-001 | 3.552e-001 | -5.893e-003 |
| 17    | 1.787e+001 | 3.059e-001 | 3.124e-001 | 6.517e-003  |
| 18    | 1.888e+001 | 2.684e-001 | 2.728e-001 | 4.380e-003  |
| 19    | 1.989e+001 | 2.423e-001 | 2.364e-001 | -5.905e-003 |
| 20    | 2.192e+001 | 1.698e-001 | 1.736e-001 | 3.750e-003  |
| 21    | 2.293e+001 | 1.670e-001 | 1.471e-001 | -1.988e-002 |
| 22    | 2.394e+001 | 1.336e-001 | 1.237e-001 | -9.886e-003 |
| 23    | 2.495e+001 | 1.182e-001 | 1.033e-001 | -1.497e-002 |
| 24    | 2.596e+001 | 9.738e-002 | 8.558e-002 | -1.180e-002 |
| 25    | 2.697e+001 | 7.470e-002 | 7.037e-002 | -4.330e-003 |
| 26    | 2.798e+001 | 7.049e-002 | 5.745e-002 | -1.303e-002 |
| 27    | 3.102e+001 | 4.243e-002 | 2.988e-002 | -1.254e-002 |

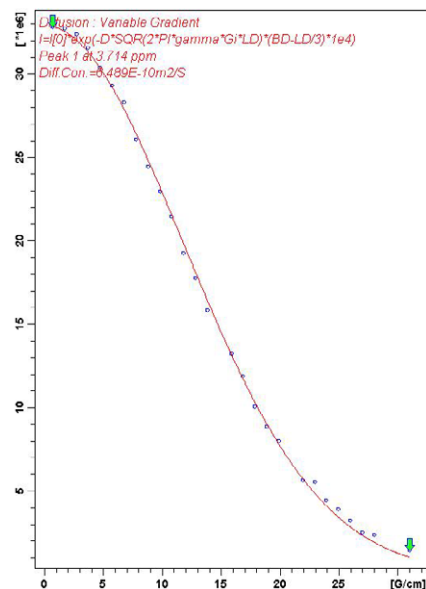

### Compound DAB-G1-(PPh<sub>2</sub>)<sub>8</sub> (3)

INTENSITY fit : Diffusion : Variable Gradient :

$$I=I[0]*\exp(-D*SQR(2*PI*\gamma*Gi*LD)*(BD-LD/3)*1e4)$$

32 points for Peak 1, Peak Point = 3.558 ppm

Converged after 40 iterations!

Results Comp. 1

I[0] = 9.957e-001  
 Diff Con. = 4.496e-010 m<sup>2</sup>/s  
 Gamma = 4.258e+003 Hz/G  
 Little Delta = 2.000m  
 Big Delta = 197.230m

RSS = 4.285e-004

SD = 3.659e-003

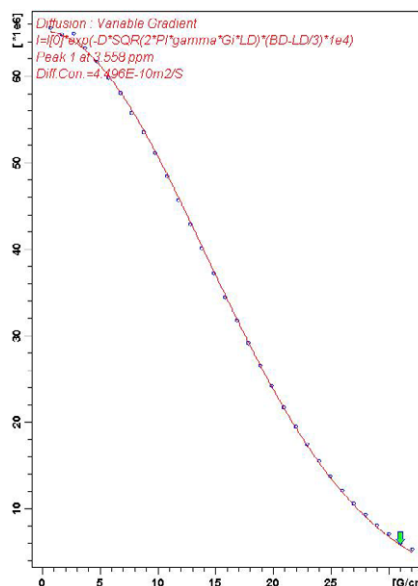

| Point | Gradient   | Expt       | Calc       | Difference  |
|-------|------------|------------|------------|-------------|
| 1     | 6.740e-001 | 1.000e+000 | 9.945e-001 | -5.468e-003 |
| 2     | 1.686e+000 | 9.894e-001 | 9.885e-001 | -8.838e-004 |
| 3     | 2.697e+000 | 9.904e-001 | 9.775e-001 | -1.291e-002 |
| 4     | 3.709e+000 | 9.651e-001 | 9.616e-001 | -3.508e-003 |
| 5     | 4.720e+000 | 9.409e-001 | 9.411e-001 | 2.274e-004  |
| 6     | 5.732e+000 | 9.135e-001 | 9.163e-001 | 2.799e-003  |
| 7     | 6.743e+000 | 8.860e-001 | 8.875e-001 | 1.449e-003  |
| 8     | 7.755e+000 | 8.509e-001 | 8.551e-001 | 4.226e-003  |
| 9     | 8.766e+000 | 8.159e-001 | 8.198e-001 | 3.830e-003  |
| 10    | 9.778e+000 | 7.791e-001 | 7.818e-001 | 2.633e-003  |
| 11    | 1.079e+001 | 7.386e-001 | 7.417e-001 | 3.043e-003  |
| 12    | 1.180e+001 | 6.965e-001 | 7.000e-001 | 3.471e-003  |
| 13    | 1.281e+001 | 6.531e-001 | 6.573e-001 | 4.165e-003  |
| 14    | 1.382e+001 | 6.105e-001 | 6.140e-001 | 3.518e-003  |
| 15    | 1.484e+001 | 5.664e-001 | 5.706e-001 | 4.142e-003  |
| 16    | 1.585e+001 | 5.244e-001 | 5.275e-001 | 3.126e-003  |
| 17    | 1.686e+001 | 4.828e-001 | 4.851e-001 | 2.304e-003  |
| 18    | 1.787e+001 | 4.443e-001 | 4.439e-001 | -3.457e-004 |
| 19    | 1.888e+001 | 4.038e-001 | 4.040e-001 | 2.523e-004  |
| 20    | 1.989e+001 | 3.680e-001 | 3.659e-001 | -2.075e-003 |
| 21    | 2.090e+001 | 3.306e-001 | 3.296e-001 | -1.011e-003 |
| 22    | 2.192e+001 | 2.964e-001 | 2.954e-001 | -9.894e-004 |
| 23    | 2.293e+001 | 2.646e-001 | 2.634e-001 | -1.196e-003 |
| 24    | 2.394e+001 | 2.356e-001 | 2.336e-001 | -1.996e-003 |
| 25    | 2.495e+001 | 2.088e-001 | 2.061e-001 | -2.677e-003 |
| 26    | 2.596e+001 | 1.835e-001 | 1.810e-001 | -2.537e-003 |
| 27    | 2.697e+001 | 1.601e-001 | 1.580e-001 | -2.073e-003 |
| 28    | 2.798e+001 | 1.397e-001 | 1.373e-001 | -2.436e-003 |
| 29    | 2.900e+001 | 1.224e-001 | 1.187e-001 | -3.773e-003 |
| 30    | 3.001e+001 | 1.056e-001 | 1.020e-001 | -3.576e-003 |
| 31    | 3.102e+001 | 8.923e-002 | 8.730e-002 | -1.935e-003 |
| 32    | 3.203e+001 | 7.873e-002 | 7.429e-002 | -4.446e-003 |

## Compound [Au<sub>4</sub>(S-C<sub>6</sub>H<sub>4</sub>-F)<sub>4</sub>]{(EN-G0-(PPh<sub>2</sub>)<sub>4</sub>)} (7)

INTENSITY fit : Diffusion : Variable Gradient :

$$I=I[0]*\exp(-D*\text{SQR}(2*\text{PI}*\text{gamma}*G*\text{LD})*(BD-\text{LD}/3)*1e4)$$

32 points for Peak 1, Peak Point = 3.889 ppm

Converged after 33 iterations!

Results Comp. 1

I[0] = 9.961e-001  
 Diff Con. = 5.587e-010 m<sup>2</sup>/s  
 Gamma = 4.258e+003 Hz/G  
 Little Delta = 2.000m  
 Big Delta = 197.230m

RSS = 7.559e-004

SD = 4.860e-003

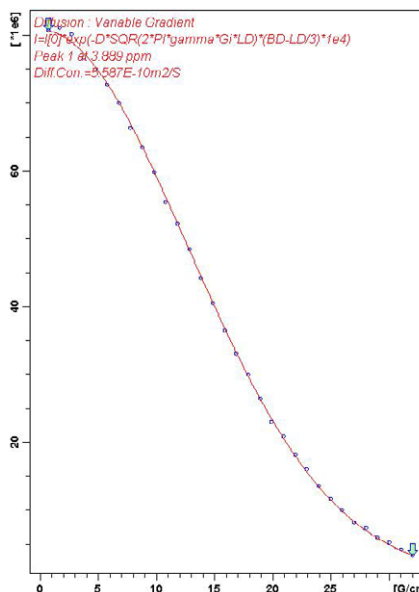

| Point | Gradient   | Expt       | Calc       | Difference  |
|-------|------------|------------|------------|-------------|
| 1     | 6.740e-001 | 9.958e-001 | 9.946e-001 | -1.201e-003 |
| 2     | 1.686e+000 | 1.000e+000 | 9.872e-001 | -1.280e-002 |
| 3     | 2.697e+000 | 9.875e-001 | 9.735e-001 | -1.397e-002 |
| 4     | 3.709e+000 | 9.458e-001 | 9.539e-001 | 8.144e-003  |
| 5     | 4.720e+000 | 9.230e-001 | 9.287e-001 | 5.662e-003  |
| 6     | 5.732e+000 | 8.962e-001 | 8.983e-001 | 2.075e-003  |
| 7     | 6.743e+000 | 8.620e-001 | 8.634e-001 | 1.383e-003  |
| 8     | 7.755e+000 | 8.176e-001 | 8.245e-001 | 6.860e-003  |
| 9     | 8.766e+000 | 7.823e-001 | 7.823e-001 | -1.656e-005 |
| 10    | 9.778e+000 | 7.359e-001 | 7.375e-001 | 1.564e-003  |
| 11    | 1.079e+001 | 6.820e-001 | 6.908e-001 | 8.836e-003  |
| 12    | 1.180e+001 | 6.428e-001 | 6.429e-001 | 1.265e-004  |
| 13    | 1.281e+001 | 5.968e-001 | 5.945e-001 | -2.275e-003 |
| 14    | 1.382e+001 | 5.437e-001 | 5.463e-001 | 2.610e-003  |
| 15    | 1.484e+001 | 4.988e-001 | 4.987e-001 | -1.184e-004 |
| 16    | 1.585e+001 | 4.491e-001 | 4.523e-001 | 3.268e-003  |
| 17    | 1.686e+001 | 4.066e-001 | 4.076e-001 | 1.088e-003  |
| 18    | 1.787e+001 | 3.690e-001 | 3.650e-001 | -3.974e-003 |
| 19    | 1.888e+001 | 3.249e-001 | 3.248e-001 | -1.135e-004 |
| 20    | 1.989e+001 | 2.818e-001 | 2.871e-001 | 5.267e-003  |
| 21    | 2.090e+001 | 2.563e-001 | 2.522e-001 | -4.156e-003 |
| 22    | 2.192e+001 | 2.220e-001 | 2.201e-001 | -1.963e-003 |
| 23    | 2.293e+001 | 1.955e-001 | 1.908e-001 | -4.711e-003 |
| 24    | 2.394e+001 | 1.653e-001 | 1.644e-001 | -9.407e-004 |
| 25    | 2.495e+001 | 1.424e-001 | 1.407e-001 | -1.711e-003 |
| 26    | 2.596e+001 | 1.220e-001 | 1.197e-001 | -2.289e-003 |
| 27    | 2.697e+001 | 9.966e-002 | 1.011e-001 | 1.488e-003  |
| 28    | 2.798e+001 | 8.899e-002 | 8.494e-002 | -4.048e-003 |
| 29    | 2.900e+001 | 7.130e-002 | 7.086e-002 | -4.429e-004 |
| 30    | 3.001e+001 | 6.354e-002 | 5.874e-002 | -4.801e-003 |
| 31    | 3.102e+001 | 4.948e-002 | 4.838e-002 | -1.098e-003 |
| 32    | 3.203e+001 | 3.897e-002 | 3.959e-002 | 6.152e-004  |

## Compound [Au<sub>4</sub>(S-C<sub>6</sub>H<sub>4</sub>-OMe)<sub>4</sub>]{(EN-G0-(PPh<sub>2</sub>)<sub>4</sub>)} (8)

INTENSITY fit : Diffusion : Variable Gradient :

$$I=I[0]*\exp(-D*\text{SQR}(2*\text{PI}*\text{gamma}*Gi*LD)*(BD-LD/3)*1e4)$$

32 points for Peak 1, Peak Point = 3.888 ppm

Converged after 34 iterations!

Results Comp. 1

I[0] = 1.012e+000  
 Diff Con. = 5.202e-010 m<sup>2</sup>/s  
 Gamma = 4.258e+003 Hz/G  
 Little Delta = 2.000m  
 Big Delta = 197.230m

RSS = 2.658e-004

SD = 2.882e-003

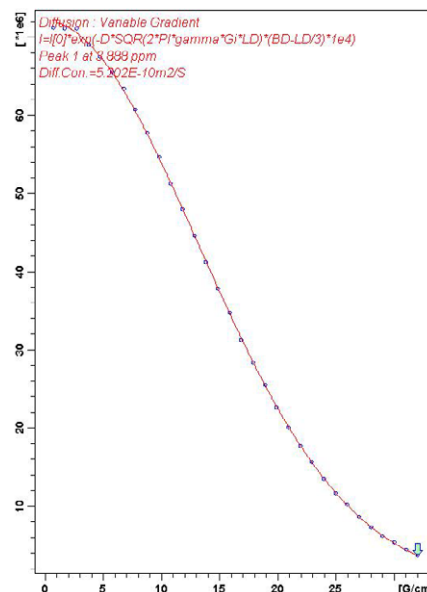

| Point | Gradient   | Expt       | Calc       | Difference  |
|-------|------------|------------|------------|-------------|
| 1     | 6.740e-001 | 1.000e+000 | 1.010e+000 | 1.026e-002  |
| 2     | 1.686e+000 | 9.978e-001 | 1.003e+000 | 5.417e-003  |
| 3     | 2.697e+000 | 9.980e-001 | 9.903e-001 | -7.727e-003 |
| 4     | 3.709e+000 | 9.689e-001 | 9.717e-001 | 2.754e-003  |
| 5     | 4.720e+000 | 9.481e-001 | 9.477e-001 | -3.455e-004 |
| 6     | 5.732e+000 | 9.204e-001 | 9.188e-001 | -1.574e-003 |
| 7     | 6.743e+000 | 8.896e-001 | 8.855e-001 | -4.030e-003 |
| 8     | 7.755e+000 | 8.520e-001 | 8.483e-001 | -3.696e-003 |
| 9     | 8.766e+000 | 8.104e-001 | 8.078e-001 | -2.554e-003 |
| 10    | 9.778e+000 | 7.673e-001 | 7.647e-001 | -2.671e-003 |
| 11    | 1.079e+001 | 7.198e-001 | 7.195e-001 | -2.972e-004 |
| 12    | 1.180e+001 | 6.727e-001 | 6.729e-001 | 2.131e-004  |
| 13    | 1.281e+001 | 6.256e-001 | 6.257e-001 | 2.321e-005  |
| 14    | 1.382e+001 | 5.778e-001 | 5.782e-001 | 4.601e-004  |
| 15    | 1.484e+001 | 5.306e-001 | 5.312e-001 | 5.498e-004  |
| 16    | 1.585e+001 | 4.865e-001 | 4.851e-001 | -1.413e-003 |
| 17    | 1.686e+001 | 4.383e-001 | 4.403e-001 | 1.953e-003  |
| 18    | 1.787e+001 | 3.978e-001 | 3.973e-001 | -5.504e-004 |
| 19    | 1.888e+001 | 3.562e-001 | 3.563e-001 | 4.681e-005  |
| 20    | 1.989e+001 | 3.167e-001 | 3.177e-001 | 9.286e-004  |
| 21    | 2.090e+001 | 2.810e-001 | 2.815e-001 | 5.047e-004  |
| 22    | 2.192e+001 | 2.466e-001 | 2.480e-001 | 1.381e-003  |
| 23    | 2.293e+001 | 2.176e-001 | 2.171e-001 | -4.387e-004 |
| 24    | 2.394e+001 | 1.880e-001 | 1.890e-001 | 1.057e-003  |
| 25    | 2.495e+001 | 1.622e-001 | 1.635e-001 | 1.371e-003  |
| 26    | 2.596e+001 | 1.411e-001 | 1.407e-001 | -4.286e-004 |
| 27    | 2.697e+001 | 1.204e-001 | 1.203e-001 | -1.188e-004 |
| 28    | 2.798e+001 | 1.007e-001 | 1.022e-001 | 1.504e-003  |
| 29    | 2.900e+001 | 8.532e-002 | 8.633e-002 | 1.008e-003  |
| 30    | 3.001e+001 | 7.358e-002 | 7.250e-002 | -1.087e-003 |
| 31    | 3.102e+001 | 6.052e-002 | 6.052e-002 | -1.818e-006 |
| 32    | 3.203e+001 | 4.999e-002 | 5.021e-002 | 2.122e-004  |

## Compound [Au<sub>4</sub>(S-C<sub>6</sub>H<sub>4</sub>-Me)<sub>4</sub>{(EN-G0-(PPh<sub>2</sub>)<sub>4</sub>)}] (9)

INTENSITY fit : Diffusion : Variable Gradient :

$$I=I[0]*\exp(-D*\text{SQR}(2*\text{PI}*\text{gamma}*\text{Gi}*\text{LD})*(BD-\text{LD}/3)*1e4)$$

32 points for Peak 1, Peak Point = 3.879 ppm

Converged after 34 iterations!

Results Comp. 1

I[0] = 1.015e+000  
 Diff Con. = 5.327e-010 m<sup>2</sup>/s  
 Gamma = 4.258e+003 Hz/G  
 Little Delta = 2.000m  
 Big Delta = 197.230m

RSS = 1.351e-003

SD = 6.498e-003

| Point | Gradient | Expt | Calc | Difference |
|-------|----------|------|------|------------|
|-------|----------|------|------|------------|

|    |            |            |            |             |
|----|------------|------------|------------|-------------|
| 1  | 6.740e-001 | 9.869e-001 | 1.013e+000 | 2.631e-002  |
| 2  | 1.686e+000 | 1.000e+000 | 1.006e+000 | 5.944e-003  |
| 3  | 2.697e+000 | 9.927e-001 | 9.927e-001 | -4.771e-005 |
| 4  | 3.709e+000 | 9.730e-001 | 9.736e-001 | 5.969e-004  |
| 5  | 4.720e+000 | 9.479e-001 | 9.490e-001 | 1.091e-003  |
| 6  | 5.732e+000 | 9.175e-001 | 9.194e-001 | 1.894e-003  |
| 7  | 6.743e+000 | 8.922e-001 | 8.853e-001 | -6.942e-003 |
| 8  | 7.755e+000 | 8.548e-001 | 8.472e-001 | -7.570e-003 |
| 9  | 8.766e+000 | 8.140e-001 | 8.058e-001 | -8.202e-003 |
| 10 | 9.778e+000 | 7.707e-001 | 7.618e-001 | -8.971e-003 |
| 11 | 1.079e+001 | 7.250e-001 | 7.157e-001 | -9.270e-003 |
| 12 | 1.180e+001 | 6.762e-001 | 6.683e-001 | -7.872e-003 |
| 13 | 1.281e+001 | 6.269e-001 | 6.203e-001 | -6.637e-003 |
| 14 | 1.382e+001 | 5.763e-001 | 5.722e-001 | -4.073e-003 |
| 15 | 1.484e+001 | 5.262e-001 | 5.246e-001 | -1.682e-003 |
| 16 | 1.585e+001 | 4.784e-001 | 4.780e-001 | -4.311e-004 |
| 17 | 1.686e+001 | 4.318e-001 | 4.328e-001 | 1.009e-003  |
| 18 | 1.787e+001 | 3.861e-001 | 3.896e-001 | 3.507e-003  |
| 19 | 1.888e+001 | 3.461e-001 | 3.485e-001 | 2.363e-003  |
| 20 | 1.989e+001 | 3.057e-001 | 3.099e-001 | 4.145e-003  |
| 21 | 2.090e+001 | 2.705e-001 | 2.738e-001 | 3.282e-003  |
| 22 | 2.192e+001 | 2.367e-001 | 2.405e-001 | 3.833e-003  |
| 23 | 2.293e+001 | 2.039e-001 | 2.099e-001 | 5.981e-003  |
| 24 | 2.394e+001 | 1.788e-001 | 1.821e-001 | 3.310e-003  |
| 25 | 2.495e+001 | 1.546e-001 | 1.570e-001 | 2.401e-003  |
| 26 | 2.596e+001 | 1.308e-001 | 1.346e-001 | 3.720e-003  |
| 27 | 2.697e+001 | 1.129e-001 | 1.146e-001 | 1.739e-003  |
| 28 | 2.798e+001 | 9.515e-002 | 9.702e-002 | 1.878e-003  |
| 29 | 2.900e+001 | 7.888e-002 | 8.162e-002 | 2.740e-003  |
| 30 | 3.001e+001 | 6.587e-002 | 6.826e-002 | 2.387e-003  |
| 31 | 3.102e+001 | 5.501e-002 | 5.674e-002 | 1.725e-003  |
| 32 | 3.203e+001 | 4.521e-002 | 4.686e-002 | 1.650e-003  |

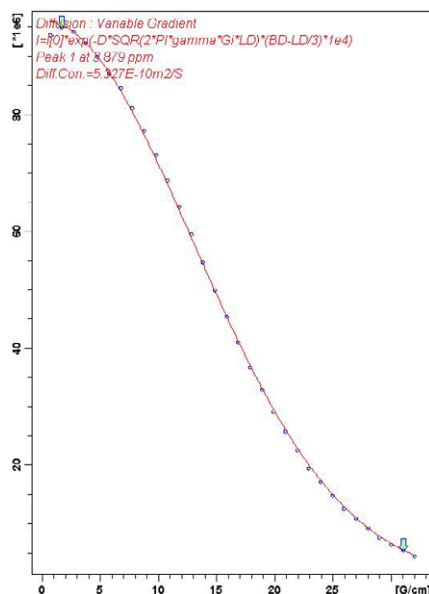

## Compound $[\text{Au}_4(\text{S-C}_6\text{H}_4\text{-NO}_2)_4\{(\text{EN-G0-(PPh}_2)_4\}]$ (10)

INTENSITY fit : Diffusion : Variable Gradient :

$$I=I[0]*\exp(-D*\text{SQR}(2*\text{PI}*\text{gamma}*\text{Gi}*\text{LD})*(\text{BD-LD}/3)*1e4)$$

32 points for Peak 1, Peak Point = 3.871 ppm

Converged after 38 iterations!

Results Comp. 1

$I[0]$  = 9.970e-001  
 Diff Con. = 4.984e-010 m<sup>2</sup>/s  
 Gamma = 4.258e+003 Hz/G  
 Little Delta = 2.000m  
 Big Delta = 197.230m

RSS = 1.086e-004

SD = 1.842e-003

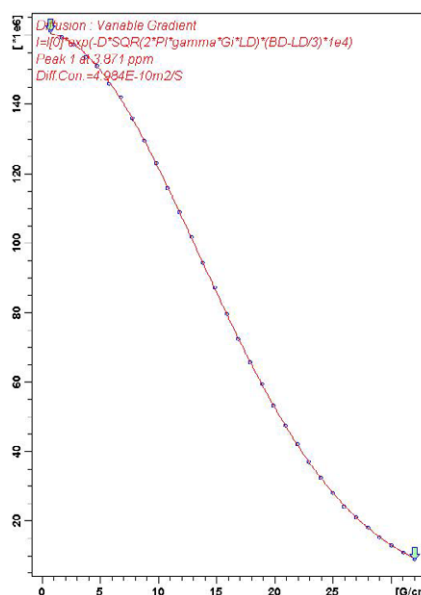

| Point | Gradient   | Expt       | Calc       | Difference  |
|-------|------------|------------|------------|-------------|
| 1     | 6.740e-001 | 1.000e+000 | 9.957e-001 | -4.299e-003 |
| 2     | 1.686e+000 | 9.880e-001 | 9.891e-001 | 1.042e-003  |
| 3     | 2.697e+000 | 9.762e-001 | 9.768e-001 | 6.422e-004  |
| 4     | 3.709e+000 | 9.533e-001 | 9.592e-001 | 5.976e-003  |
| 5     | 4.720e+000 | 9.365e-001 | 9.366e-001 | 5.693e-005  |
| 6     | 5.732e+000 | 9.059e-001 | 9.092e-001 | 3.271e-003  |
| 7     | 6.743e+000 | 8.813e-001 | 8.776e-001 | -3.696e-003 |
| 8     | 7.755e+000 | 8.435e-001 | 8.422e-001 | -1.274e-003 |
| 9     | 8.766e+000 | 8.037e-001 | 8.037e-001 | -2.606e-005 |
| 10    | 9.778e+000 | 7.626e-001 | 7.625e-001 | -1.326e-004 |
| 11    | 1.079e+001 | 7.181e-001 | 7.193e-001 | 1.228e-003  |
| 12    | 1.180e+001 | 6.748e-001 | 6.746e-001 | -1.279e-004 |
| 13    | 1.281e+001 | 6.310e-001 | 6.292e-001 | -1.835e-003 |
| 14    | 1.382e+001 | 5.855e-001 | 5.834e-001 | -2.089e-003 |
| 15    | 1.484e+001 | 5.399e-001 | 5.378e-001 | -2.037e-003 |
| 16    | 1.585e+001 | 4.927e-001 | 4.930e-001 | 3.071e-004  |
| 17    | 1.686e+001 | 4.485e-001 | 4.493e-001 | 8.493e-004  |
| 18    | 1.787e+001 | 4.071e-001 | 4.072e-001 | 1.073e-004  |
| 19    | 1.888e+001 | 3.679e-001 | 3.669e-001 | -1.015e-003 |
| 20    | 1.989e+001 | 3.289e-001 | 3.287e-001 | -2.448e-004 |
| 21    | 2.090e+001 | 2.932e-001 | 2.927e-001 | -4.323e-004 |
| 22    | 2.192e+001 | 2.597e-001 | 2.593e-001 | -4.340e-004 |
| 23    | 2.293e+001 | 2.287e-001 | 2.283e-001 | -4.632e-004 |
| 24    | 2.394e+001 | 1.995e-001 | 1.999e-001 | 4.202e-004  |
| 25    | 2.495e+001 | 1.729e-001 | 1.740e-001 | 1.066e-003  |
| 26    | 2.596e+001 | 1.485e-001 | 1.506e-001 | 2.078e-003  |
| 27    | 2.697e+001 | 1.290e-001 | 1.296e-001 | 6.126e-004  |
| 28    | 2.798e+001 | 1.101e-001 | 1.109e-001 | 7.854e-004  |
| 29    | 2.900e+001 | 9.356e-002 | 9.433e-002 | 7.717e-004  |
| 30    | 3.001e+001 | 7.835e-002 | 7.980e-002 | 1.454e-003  |
| 31    | 3.102e+001 | 6.643e-002 | 6.712e-002 | 6.924e-004  |
| 32    | 3.203e+001 | 5.505e-002 | 5.613e-002 | 1.074e-003  |



## Compound [Au<sub>4</sub>(S-C<sub>6</sub>H<sub>4</sub>-F)<sub>4</sub>]{(DAB-G0-(PPh<sub>2</sub>)<sub>4</sub>)} (11)

INTENSITY fit : Diffusion : Variable Gradient :

$$I=I[0]*\exp(-D*\text{SQR}(2*\text{PI}*\text{gamma}*\text{Gi}*\text{LD})*(\text{BD}-\text{LD}/3)*1e4)$$

32 points for Peak 1, Peak Point = 4.129 ppm

Converged after 38 iterations!

Results Comp. 1

I[0] = 9.951e-001  
 Diff Con. = 5.240e-010 m<sup>2</sup>/s  
 Gamma = 4.258e+003 Hz/G  
 Little Delta = 2.000m  
 Big Delta = 197.230m

RSS = 6.685e-004

SD = 4.571e-003

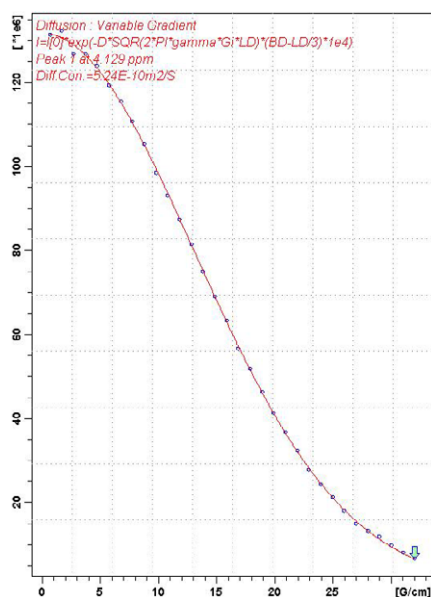

| Point | Gradient   | Expt       | Calc       | Difference  |
|-------|------------|------------|------------|-------------|
| 1     | 6.740e-001 | 9.920e-001 | 9.938e-001 | 1.746e-003  |
| 2     | 1.686e+000 | 1.000e+000 | 9.868e-001 | -1.320e-002 |
| 3     | 2.697e+000 | 9.571e-001 | 9.740e-001 | 1.691e-002  |
| 4     | 3.709e+000 | 9.579e-001 | 9.555e-001 | -2.376e-003 |
| 5     | 4.720e+000 | 9.367e-001 | 9.318e-001 | -4.827e-003 |
| 6     | 5.732e+000 | 9.015e-001 | 9.032e-001 | 1.730e-003  |
| 7     | 6.743e+000 | 8.719e-001 | 8.702e-001 | -1.604e-003 |
| 8     | 7.755e+000 | 8.368e-001 | 8.334e-001 | -3.400e-003 |
| 9     | 8.766e+000 | 7.954e-001 | 7.934e-001 | -2.058e-003 |
| 10    | 9.778e+000 | 7.443e-001 | 7.506e-001 | 6.391e-003  |
| 11    | 1.079e+001 | 7.025e-001 | 7.060e-001 | 3.490e-003  |
| 12    | 1.180e+001 | 6.595e-001 | 6.600e-001 | 5.216e-004  |
| 13    | 1.281e+001 | 6.148e-001 | 6.133e-001 | -1.522e-003 |
| 14    | 1.382e+001 | 5.654e-001 | 5.665e-001 | 1.074e-003  |
| 15    | 1.484e+001 | 5.205e-001 | 5.201e-001 | -4.382e-004 |
| 16    | 1.585e+001 | 4.771e-001 | 4.746e-001 | -2.511e-003 |
| 17    | 1.686e+001 | 4.273e-001 | 4.305e-001 | 3.149e-003  |
| 18    | 1.787e+001 | 3.899e-001 | 3.881e-001 | -1.735e-003 |
| 19    | 1.888e+001 | 3.484e-001 | 3.478e-001 | -5.406e-004 |
| 20    | 1.989e+001 | 3.116e-001 | 3.099e-001 | -1.691e-003 |
| 21    | 2.090e+001 | 2.764e-001 | 2.743e-001 | -2.010e-003 |
| 22    | 2.192e+001 | 2.433e-001 | 2.415e-001 | -1.852e-003 |
| 23    | 2.293e+001 | 2.079e-001 | 2.112e-001 | 3.302e-003  |
| 24    | 2.394e+001 | 1.829e-001 | 1.837e-001 | 7.872e-004  |
| 25    | 2.495e+001 | 1.595e-001 | 1.588e-001 | -7.629e-004 |
| 26    | 2.596e+001 | 1.341e-001 | 1.364e-001 | 2.263e-003  |
| 27    | 2.697e+001 | 1.114e-001 | 1.165e-001 | 5.084e-003  |
| 28    | 2.798e+001 | 9.894e-002 | 9.887e-002 | -7.460e-005 |
| 29    | 2.900e+001 | 8.776e-002 | 8.341e-002 | -4.346e-003 |
| 30    | 3.001e+001 | 7.232e-002 | 6.996e-002 | -2.363e-003 |
| 31    | 3.102e+001 | 5.879e-002 | 5.832e-002 | -4.730e-004 |
| 32    | 3.203e+001 | 4.878e-002 | 4.832e-002 | -4.625e-004 |

## Compound [Au<sub>4</sub>(S-C<sub>6</sub>H<sub>4</sub>-OMe)<sub>4</sub>]{(DAB-G0-(PPh<sub>2</sub>)<sub>4</sub>)} (12)

INTENSITY fit : Diffusion : Variable Gradient :

$$I=I[0]*\exp(-D*SQR(2*PI*\gamma*Gi*LD)*(BD-LD/3)*1e4)$$

32 points for Peak 1, Peak Point = 3.746 ppm

Converged after 41 iterations!

Results Comp. 1

I[0] = 9.934e-001  
 Diff Con. = 5.131e-010 m<sup>2</sup>/s  
 Gamma = 4.258e+003 Hz/G  
 Little Delta = 2.000m  
 Big Delta = 197.230m

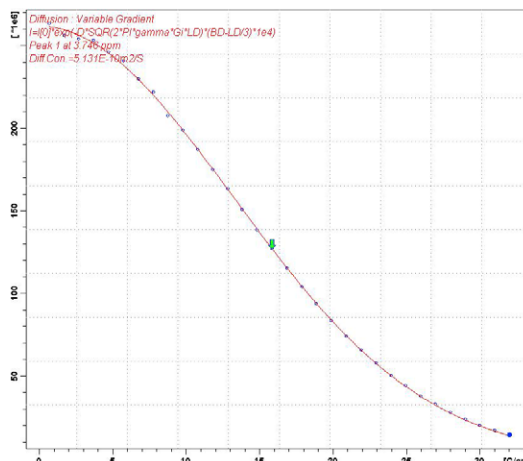

RSS = 5.673e-004

SD = 4.210e-003

| Point | Gradient   | Expt       | Calc       | Difference  |
|-------|------------|------------|------------|-------------|
| 1     | 6.740e-001 | 1.000e+000 | 9.921e-001 | -7.900e-003 |
| 2     | 1.686e+000 | 9.726e-001 | 9.853e-001 | 1.265e-002  |
| 3     | 2.697e+000 | 9.643e-001 | 9.728e-001 | 8.473e-003  |
| 4     | 3.709e+000 | 9.604e-001 | 9.547e-001 | -5.641e-003 |
| 5     | 4.720e+000 | 9.336e-001 | 9.315e-001 | -2.071e-003 |
| 6     | 5.732e+000 | 9.130e-001 | 9.035e-001 | -9.516e-003 |
| 7     | 6.743e+000 | 8.724e-001 | 8.712e-001 | -1.238e-003 |
| 8     | 7.755e+000 | 8.414e-001 | 8.350e-001 | -6.377e-003 |
| 9     | 8.766e+000 | 7.869e-001 | 7.957e-001 | 8.806e-003  |
| 10    | 9.778e+000 | 7.545e-001 | 7.538e-001 | -7.024e-004 |
| 11    | 1.079e+001 | 7.093e-001 | 7.098e-001 | 5.387e-004  |
| 12    | 1.180e+001 | 6.631e-001 | 6.645e-001 | 1.382e-003  |
| 13    | 1.281e+001 | 6.186e-001 | 6.184e-001 | -1.975e-004 |
| 14    | 1.382e+001 | 5.711e-001 | 5.722e-001 | 1.078e-003  |
| 15    | 1.484e+001 | 5.249e-001 | 5.262e-001 | 1.309e-003  |
| 16    | 1.585e+001 | 4.808e-001 | 4.811e-001 | 3.038e-004  |
| 17    | 1.686e+001 | 4.366e-001 | 4.373e-001 | 6.675e-004  |
| 18    | 1.787e+001 | 3.933e-001 | 3.951e-001 | 1.832e-003  |
| 19    | 1.888e+001 | 3.551e-001 | 3.549e-001 | -2.073e-004 |
| 20    | 1.989e+001 | 3.164e-001 | 3.169e-001 | 4.624e-004  |
| 21    | 2.090e+001 | 2.801e-001 | 2.813e-001 | 1.197e-003  |
| 22    | 2.192e+001 | 2.480e-001 | 2.482e-001 | 2.651e-004  |
| 23    | 2.293e+001 | 2.188e-001 | 2.178e-001 | -1.004e-003 |
| 24    | 2.394e+001 | 1.896e-001 | 1.899e-001 | 3.081e-004  |
| 25    | 2.495e+001 | 1.661e-001 | 1.646e-001 | -1.422e-003 |
| 26    | 2.596e+001 | 1.417e-001 | 1.419e-001 | 1.649e-004  |
| 27    | 2.697e+001 | 1.230e-001 | 1.216e-001 | -1.422e-003 |
| 28    | 2.798e+001 | 1.052e-001 | 1.035e-001 | -1.636e-003 |
| 29    | 2.900e+001 | 8.846e-002 | 8.766e-002 | -8.001e-004 |
| 30    | 3.001e+001 | 7.492e-002 | 7.379e-002 | -1.125e-003 |
| 31    | 3.102e+001 | 6.348e-002 | 6.175e-002 | -1.726e-003 |
| 32    | 3.203e+001 | 5.297e-002 | 5.136e-002 | -1.614e-003 |

## Compound [Au<sub>4</sub>(S-C<sub>6</sub>H<sub>4</sub>-Me)<sub>4</sub>]{(DAB-G0-(PPh<sub>2</sub>)<sub>4</sub>)} (13)

INTENSITY fit : Diffusion : Variable Gradient :

$$I=I[0]*\exp(-D*\text{SQR}(2*\text{PI}*\text{gamma}*\text{Gi}*\text{LD})*(\text{BD}-\text{LD}/3)*1e4)$$

32 points for Peak 1, Peak Point = 4.131 ppm

Converged after 35 iterations!

Results Comp. 1

I[0] = 1.011e+000  
 Diff Con. = 4.962e-010 m<sup>2</sup>/s  
 Gamma = 4.258e+003 Hz/G  
 Little Delta = 2.000m  
 Big Delta = 197.230m

RSS = 5.783e-004

SD = 4.251e-003

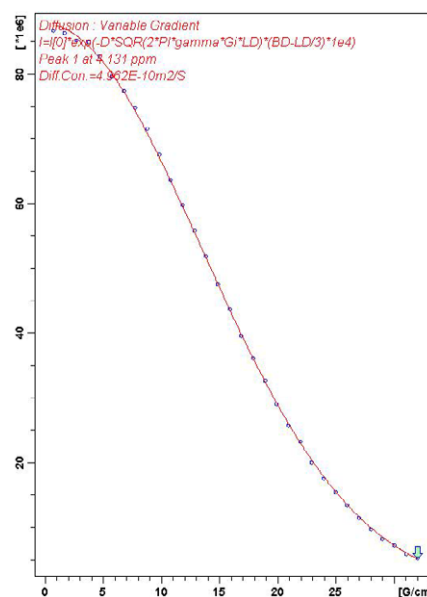

| Point | Gradient   | Expt       | Calc       | Difference  |
|-------|------------|------------|------------|-------------|
| 1     | 6.740e-001 | 1.000e+000 | 1.010e+000 | 9.875e-003  |
| 2     | 1.686e+000 | 9.949e-001 | 1.003e+000 | 8.252e-003  |
| 3     | 2.697e+000 | 9.827e-001 | 9.908e-001 | 8.139e-003  |
| 4     | 3.709e+000 | 9.787e-001 | 9.731e-001 | -5.625e-003 |
| 5     | 4.720e+000 | 9.533e-001 | 9.502e-001 | -3.159e-003 |
| 6     | 5.732e+000 | 9.177e-001 | 9.225e-001 | 4.845e-003  |
| 7     | 6.743e+000 | 8.924e-001 | 8.906e-001 | -1.789e-003 |
| 8     | 7.755e+000 | 8.618e-001 | 8.549e-001 | -6.915e-003 |
| 9     | 8.766e+000 | 8.244e-001 | 8.159e-001 | -8.493e-003 |
| 10    | 9.778e+000 | 7.786e-001 | 7.743e-001 | -4.341e-003 |
| 11    | 1.079e+001 | 7.335e-001 | 7.306e-001 | -2.896e-003 |
| 12    | 1.180e+001 | 6.888e-001 | 6.854e-001 | -3.410e-003 |
| 13    | 1.281e+001 | 6.429e-001 | 6.394e-001 | -3.459e-003 |
| 14    | 1.382e+001 | 5.968e-001 | 5.931e-001 | -3.706e-003 |
| 15    | 1.484e+001 | 5.469e-001 | 5.470e-001 | 4.435e-005  |
| 16    | 1.585e+001 | 5.019e-001 | 5.016e-001 | -2.941e-004 |
| 17    | 1.686e+001 | 4.556e-001 | 4.573e-001 | 1.744e-003  |
| 18    | 1.787e+001 | 4.152e-001 | 4.146e-001 | -6.343e-004 |
| 19    | 1.888e+001 | 3.753e-001 | 3.737e-001 | -1.628e-003 |
| 20    | 1.989e+001 | 3.335e-001 | 3.350e-001 | 1.516e-003  |
| 21    | 2.090e+001 | 2.953e-001 | 2.985e-001 | 3.161e-003  |
| 22    | 2.192e+001 | 2.658e-001 | 2.645e-001 | -1.292e-003 |
| 23    | 2.293e+001 | 2.286e-001 | 2.330e-001 | 4.471e-003  |
| 24    | 2.394e+001 | 2.007e-001 | 2.042e-001 | 3.442e-003  |
| 25    | 2.495e+001 | 1.760e-001 | 1.778e-001 | 1.827e-003  |
| 26    | 2.596e+001 | 1.528e-001 | 1.540e-001 | 1.175e-003  |
| 27    | 2.697e+001 | 1.301e-001 | 1.326e-001 | 2.513e-003  |
| 28    | 2.798e+001 | 1.105e-001 | 1.136e-001 | 3.047e-003  |
| 29    | 2.900e+001 | 9.319e-002 | 9.667e-002 | 3.488e-003  |
| 30    | 3.001e+001 | 8.209e-002 | 8.184e-002 | -2.448e-004 |
| 31    | 3.102e+001 | 6.602e-002 | 6.889e-002 | 2.872e-003  |
| 32    | 3.203e+001 | 5.861e-002 | 5.765e-002 | -9.566e-004 |

## Compound $[\text{Au}_4(\text{S-C}_6\text{H}_4\text{-NO}_2)_4\{(\text{DAB-G0-(PPh}_2)_4\}]$ (14)

INTENSITY fit : Diffusion : Variable Gradient :

$$I=I[0]*\exp(-D*\text{SQR}(2*\text{PI}*\text{gamma}*\text{Gi}*\text{LD})*(BD\text{-LD}/3)*1e4)$$

32 points for Peak 1, Peak Point = 4.041 ppm

Converged after 37 iterations!

Results Comp. 1

$I[0]$  = 1.004e+000  
 Diff Con. = 4.760e-010 m<sup>2</sup>/s  
 Gamma = 4.258e+003 Hz/G  
 Little Delta = 2.000m  
 Big Delta = 197.230m

RSS = 4.953e-004

SD = 3.934e-003

| Point | Gradient   | Expt       | Calc       | Difference  |
|-------|------------|------------|------------|-------------|
| 1     | 6.740e-001 | 1.000e+000 | 1.003e+000 | 3.069e-003  |
| 2     | 1.686e+000 | 9.897e-001 | 9.967e-001 | 6.925e-003  |
| 3     | 2.697e+000 | 9.730e-001 | 9.849e-001 | 1.195e-002  |
| 4     | 3.709e+000 | 9.731e-001 | 9.680e-001 | -5.172e-003 |
| 5     | 4.720e+000 | 9.553e-001 | 9.461e-001 | -9.191e-003 |
| 6     | 5.732e+000 | 9.225e-001 | 9.197e-001 | -2.860e-003 |
| 7     | 6.743e+000 | 8.918e-001 | 8.891e-001 | -2.628e-003 |
| 8     | 7.755e+000 | 8.553e-001 | 8.549e-001 | -4.771e-004 |
| 9     | 8.766e+000 | 8.211e-001 | 8.175e-001 | -3.678e-003 |
| 10    | 9.778e+000 | 7.798e-001 | 7.774e-001 | -2.433e-003 |
| 11    | 1.079e+001 | 7.321e-001 | 7.353e-001 | 3.197e-003  |
| 12    | 1.180e+001 | 6.972e-001 | 6.916e-001 | -5.603e-003 |
| 13    | 1.281e+001 | 6.441e-001 | 6.470e-001 | 2.909e-003  |
| 14    | 1.382e+001 | 6.025e-001 | 6.020e-001 | -5.138e-004 |
| 15    | 1.484e+001 | 5.588e-001 | 5.570e-001 | -1.864e-003 |
| 16    | 1.585e+001 | 5.114e-001 | 5.126e-001 | 1.184e-003  |
| 17    | 1.686e+001 | 4.706e-001 | 4.691e-001 | -1.463e-003 |
| 18    | 1.787e+001 | 4.263e-001 | 4.270e-001 | 6.612e-004  |
| 19    | 1.888e+001 | 3.821e-001 | 3.865e-001 | 4.426e-003  |
| 20    | 1.989e+001 | 3.438e-001 | 3.480e-001 | 4.215e-003  |
| 21    | 2.090e+001 | 3.136e-001 | 3.115e-001 | -2.039e-003 |
| 22    | 2.192e+001 | 2.763e-001 | 2.774e-001 | 1.126e-003  |
| 23    | 2.293e+001 | 2.434e-001 | 2.457e-001 | 2.320e-003  |
| 24    | 2.394e+001 | 2.145e-001 | 2.164e-001 | 1.861e-003  |
| 25    | 2.495e+001 | 1.901e-001 | 1.895e-001 | -5.988e-004 |
| 26    | 2.596e+001 | 1.654e-001 | 1.651e-001 | -2.997e-004 |
| 27    | 2.697e+001 | 1.462e-001 | 1.431e-001 | -3.110e-003 |
| 28    | 2.798e+001 | 1.204e-001 | 1.233e-001 | 2.895e-003  |
| 29    | 2.900e+001 | 1.088e-001 | 1.056e-001 | -3.187e-003 |
| 30    | 3.001e+001 | 9.319e-002 | 9.003e-002 | -3.154e-003 |
| 31    | 3.102e+001 | 7.526e-002 | 7.632e-002 | 1.056e-003  |
| 32    | 3.203e+001 | 6.429e-002 | 6.433e-002 | 3.447e-005  |

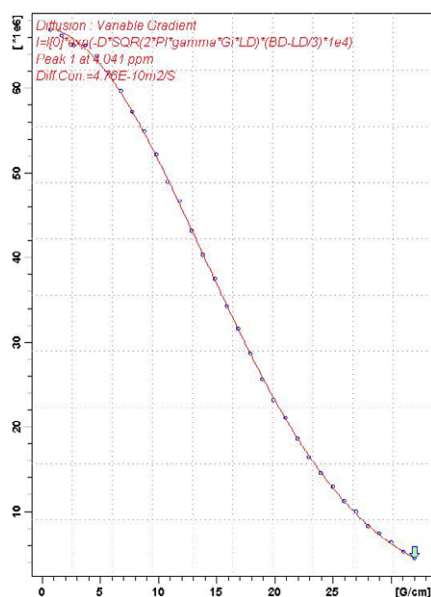

## Compound $[\text{Au}_8(\text{S-C}_6\text{H}_4\text{-F})_8\{(\text{DAB-G1-(PPh}_2)_8\}]$ (15)

INTENSITY fit : Diffusion : Variable Gradient :

$$I=I[0]*\exp(-D*\text{SQR}(2*\text{PI}*\text{gamma}*\text{Gi}*\text{LD})*(\text{BD-LD}/3)*1e4)$$

32 points for Peak 1, Peak Point = 4.145 ppm

Converged after 39 iterations!

Results Comp. 1

$I[0]$  = 9.992e-001  
 Diff Con. = 3.780e-010 m<sup>2</sup>/s  
 Gamma = 4.258e+003 Hz/G  
 Little Delta = 2.000m  
 Big Delta = 197.230m

RSS = 1.182e-004

SD = 1.922e-003

| Point | Gradient   | Expt       | Calc       | Difference  |
|-------|------------|------------|------------|-------------|
| 1     | 6.740e-001 | 1.000e+000 | 9.982e-001 | -1.811e-003 |
| 2     | 1.686e+000 | 9.951e-001 | 9.931e-001 | -1.926e-003 |
| 3     | 2.697e+000 | 9.826e-001 | 9.838e-001 | 1.180e-003  |
| 4     | 3.709e+000 | 9.682e-001 | 9.703e-001 | 2.094e-003  |
| 5     | 4.720e+000 | 9.551e-001 | 9.529e-001 | -2.232e-003 |
| 6     | 5.732e+000 | 9.323e-001 | 9.317e-001 | -5.879e-004 |
| 7     | 6.743e+000 | 9.060e-001 | 9.071e-001 | 1.045e-003  |
| 8     | 7.755e+000 | 8.785e-001 | 8.792e-001 | 7.136e-004  |
| 9     | 8.766e+000 | 8.520e-001 | 8.485e-001 | -3.526e-003 |
| 10    | 9.778e+000 | 8.186e-001 | 8.153e-001 | -3.302e-003 |
| 11    | 1.079e+001 | 7.749e-001 | 7.800e-001 | 5.151e-003  |
| 12    | 1.180e+001 | 7.406e-001 | 7.430e-001 | 2.375e-003  |
| 13    | 1.281e+001 | 7.033e-001 | 7.047e-001 | 1.366e-003  |
| 14    | 1.382e+001 | 6.639e-001 | 6.655e-001 | 1.541e-003  |
| 15    | 1.484e+001 | 6.267e-001 | 6.257e-001 | -1.007e-003 |
| 16    | 1.585e+001 | 5.870e-001 | 5.857e-001 | -1.223e-003 |
| 17    | 1.686e+001 | 5.433e-001 | 5.459e-001 | 2.620e-003  |
| 18    | 1.787e+001 | 5.049e-001 | 5.066e-001 | 1.782e-003  |
| 19    | 1.888e+001 | 4.689e-001 | 4.681e-001 | -7.468e-004 |
| 20    | 1.989e+001 | 4.308e-001 | 4.307e-001 | -1.394e-004 |
| 21    | 2.090e+001 | 3.968e-001 | 3.945e-001 | -2.382e-003 |
| 22    | 2.192e+001 | 3.585e-001 | 3.598e-001 | 1.305e-003  |
| 23    | 2.293e+001 | 3.256e-001 | 3.267e-001 | 1.028e-003  |
| 24    | 2.394e+001 | 2.935e-001 | 2.953e-001 | 1.829e-003  |
| 25    | 2.495e+001 | 2.659e-001 | 2.658e-001 | -2.638e-005 |
| 26    | 2.596e+001 | 2.403e-001 | 2.383e-001 | -1.981e-003 |
| 27    | 2.697e+001 | 2.130e-001 | 2.126e-001 | -3.350e-004 |
| 28    | 2.798e+001 | 1.915e-001 | 1.889e-001 | -2.532e-003 |
| 29    | 2.900e+001 | 1.678e-001 | 1.671e-001 | -6.422e-004 |
| 30    | 3.001e+001 | 1.476e-001 | 1.472e-001 | -3.956e-004 |
| 31    | 3.102e+001 | 1.304e-001 | 1.291e-001 | -1.344e-003 |
| 32    | 3.203e+001 | 1.137e-001 | 1.127e-001 | -9.919e-004 |

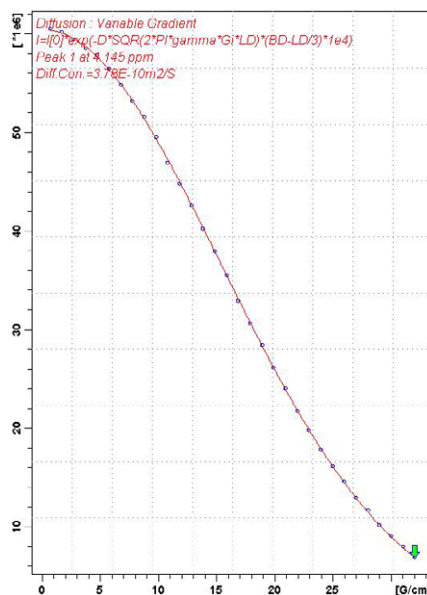

## Compound $[\text{Au}_8(\text{S-C}_6\text{H}_4\text{-OMe})_8\{\text{DAB-G1-(PPh}_2)_8\}]$ (16)

INTENSITY fit : Diffusion : Variable Gradient :

$$I=I[0]*\exp(-D*\text{SQR}(2*\text{PI}*\text{gamma}*\text{Gi}*\text{LD})*(\text{BD-LD}/3)*1e4)$$

32 points for Peak 1, Peak Point = 4.184 ppm

Converged after 45 iterations!

Results Comp. 1

$I[0]$  = 1.006e+000  
 Diff Con. = 3.489e-010 m<sup>2</sup>/s  
 Gamma = 4.258e+003 Hz/G  
 Little Delta = 2.000m  
 Big Delta = 197.230m

RSS = 1.310e-004

SD = 2.023e-003

| Point | Gradient   | Expt       | Calc       | Difference  |
|-------|------------|------------|------------|-------------|
| 1     | 6.740e-001 | 1.000e+000 | 1.006e+000 | 5.562e-003  |
| 2     | 1.686e+000 | 9.958e-001 | 1.001e+000 | 5.040e-003  |
| 3     | 2.697e+000 | 9.899e-001 | 9.922e-001 | 2.267e-003  |
| 4     | 3.709e+000 | 9.786e-001 | 9.796e-001 | 1.070e-003  |
| 5     | 4.720e+000 | 9.625e-001 | 9.634e-001 | 8.791e-004  |
| 6     | 5.732e+000 | 9.444e-001 | 9.436e-001 | -7.685e-004 |
| 7     | 6.743e+000 | 9.221e-001 | 9.205e-001 | -1.625e-003 |
| 8     | 7.755e+000 | 8.978e-001 | 8.944e-001 | -3.474e-003 |
| 9     | 8.766e+000 | 8.685e-001 | 8.655e-001 | -2.952e-003 |
| 10    | 9.778e+000 | 8.372e-001 | 8.342e-001 | -2.963e-003 |
| 11    | 1.079e+001 | 8.017e-001 | 8.008e-001 | -8.840e-004 |
| 12    | 1.180e+001 | 7.674e-001 | 7.657e-001 | -1.715e-003 |
| 13    | 1.281e+001 | 7.312e-001 | 7.292e-001 | -2.051e-003 |
| 14    | 1.382e+001 | 6.932e-001 | 6.916e-001 | -1.549e-003 |
| 15    | 1.484e+001 | 6.554e-001 | 6.534e-001 | -2.006e-003 |
| 16    | 1.585e+001 | 6.162e-001 | 6.148e-001 | -1.461e-003 |
| 17    | 1.686e+001 | 5.763e-001 | 5.761e-001 | -2.103e-004 |
| 18    | 1.787e+001 | 5.389e-001 | 5.377e-001 | -1.207e-003 |
| 19    | 1.888e+001 | 5.001e-001 | 4.998e-001 | -2.071e-004 |
| 20    | 1.989e+001 | 4.621e-001 | 4.628e-001 | 6.809e-004  |
| 21    | 2.090e+001 | 4.261e-001 | 4.268e-001 | 6.923e-004  |
| 22    | 2.192e+001 | 3.918e-001 | 3.920e-001 | 2.460e-004  |
| 23    | 2.293e+001 | 3.585e-001 | 3.586e-001 | 1.357e-004  |
| 24    | 2.394e+001 | 3.251e-001 | 3.267e-001 | 1.641e-003  |
| 25    | 2.495e+001 | 2.956e-001 | 2.965e-001 | 9.446e-004  |
| 26    | 2.596e+001 | 2.674e-001 | 2.680e-001 | 6.112e-004  |
| 27    | 2.697e+001 | 2.404e-001 | 2.412e-001 | 8.307e-004  |
| 28    | 2.798e+001 | 2.154e-001 | 2.163e-001 | 9.497e-004  |
| 29    | 2.900e+001 | 1.923e-001 | 1.932e-001 | 8.655e-004  |
| 30    | 3.001e+001 | 1.702e-001 | 1.718e-001 | 1.627e-003  |
| 31    | 3.102e+001 | 1.503e-001 | 1.522e-001 | 1.907e-003  |
| 32    | 3.203e+001 | 1.325e-001 | 1.343e-001 | 1.782e-003  |

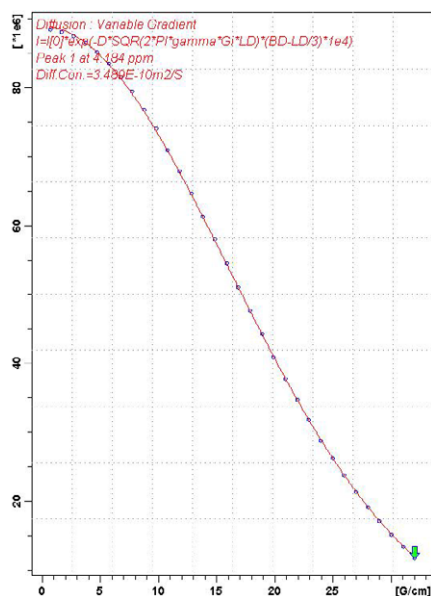

## Compound $[\text{Au}_8(\text{S-C}_6\text{H}_4\text{-Me})_8\{(\text{DAB-G1-(PPh}_2)_8\}]$ (17)

INTENSITY fit : Diffusion : Variable Gradient :

$$I=I[0]*\exp(-D*\text{SQR}(2*\text{PI}*\text{gamma}*\text{Gi}*\text{LD})*(\text{BD-LD}/3)*1e4)$$

64 points for Peak 1, Peak Point = 4.166 ppm

Converged after 47 iterations!

Results Comp. 1

$I[0]$  = 1.008e+000  
 Diff Con. = 3.513e-010 m<sup>2</sup>/s  
 Gamma = 4.258e+003 Hz/G  
 Little Delta = 2.000m  
 Big Delta = 197.230m

RSS = 2.193e-003

SD = 5.854e-003

| Point | Gradient   | Expt       | Calc       | Difference  |
|-------|------------|------------|------------|-------------|
| 1     | 6.740e-001 | 9.947e-001 | 1.007e+000 | 1.273e-002  |
| 2     | 1.172e+000 | 9.896e-001 | 1.006e+000 | 1.605e-002  |
| 3     | 1.670e+000 | 9.867e-001 | 1.003e+000 | 1.614e-002  |
| 4     | 2.167e+000 | 1.000e+000 | 9.990e-001 | -9.664e-004 |
| 5     | 2.665e+000 | 9.874e-001 | 9.943e-001 | 6.859e-003  |
| 6     | 3.163e+000 | 9.910e-001 | 9.886e-001 | -2.442e-003 |
| 7     | 3.661e+000 | 9.744e-001 | 9.820e-001 | 7.601e-003  |
| 8     | 4.158e+000 | 9.771e-001 | 9.745e-001 | -2.617e-003 |
| 9     | 4.656e+000 | 9.619e-001 | 9.661e-001 | 4.163e-003  |
| 10    | 5.154e+000 | 9.618e-001 | 9.568e-001 | -5.010e-003 |
| 11    | 5.651e+000 | 9.472e-001 | 9.467e-001 | -5.839e-004 |
| 12    | 6.149e+000 | 9.319e-001 | 9.357e-001 | 3.824e-003  |
| 13    | 6.647e+000 | 9.241e-001 | 9.240e-001 | -1.231e-004 |
| 14    | 7.145e+000 | 9.205e-001 | 9.116e-001 | -8.914e-003 |
| 15    | 7.642e+000 | 9.011e-001 | 8.984e-001 | -2.742e-003 |
| 16    | 8.140e+000 | 8.923e-001 | 8.846e-001 | -7.765e-003 |
| 17    | 8.638e+000 | 8.697e-001 | 8.701e-001 | 4.043e-004  |
| 18    | 9.135e+000 | 8.623e-001 | 8.550e-001 | -7.309e-003 |
| 19    | 9.633e+000 | 8.481e-001 | 8.394e-001 | -8.768e-003 |
| 20    | 1.013e+001 | 8.309e-001 | 8.232e-001 | -7.717e-003 |
| 21    | 1.063e+001 | 8.195e-001 | 8.066e-001 | -1.296e-002 |
| 22    | 1.113e+001 | 7.908e-001 | 7.895e-001 | -1.341e-003 |
| 23    | 1.162e+001 | 7.747e-001 | 7.720e-001 | -2.699e-003 |
| 24    | 1.212e+001 | 7.634e-001 | 7.541e-001 | -9.276e-003 |
| 25    | 1.262e+001 | 7.381e-001 | 7.360e-001 | -2.032e-003 |
| 26    | 1.312e+001 | 7.213e-001 | 7.176e-001 | -3.669e-003 |
| 27    | 1.361e+001 | 6.989e-001 | 6.990e-001 | 1.212e-004  |
| 28    | 1.411e+001 | 6.834e-001 | 6.802e-001 | -3.243e-003 |
| 29    | 1.461e+001 | 6.666e-001 | 6.612e-001 | -5.375e-003 |
| 30    | 1.511e+001 | 6.455e-001 | 6.422e-001 | -3.312e-003 |
| 31    | 1.561e+001 | 6.238e-001 | 6.230e-001 | -7.152e-004 |
| 32    | 1.610e+001 | 6.073e-001 | 6.039e-001 | -3.367e-003 |
| 33    | 1.660e+001 | 5.872e-001 | 5.848e-001 | -2.442e-003 |
| 34    | 1.710e+001 | 5.711e-001 | 5.657e-001 | -5.362e-003 |
| 35    | 1.760e+001 | 5.422e-001 | 5.468e-001 | 4.523e-003  |
| 36    | 1.809e+001 | 5.321e-001 | 5.279e-001 | -4.269e-003 |
| 37    | 1.859e+001 | 5.045e-001 | 5.092e-001 | 4.652e-003  |

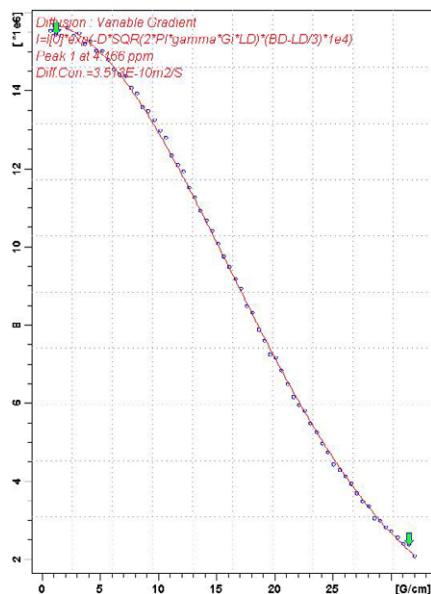

|    |            |            |            |             |
|----|------------|------------|------------|-------------|
| 38 | 1.909e+001 | 4.860e-001 | 4.906e-001 | 4.563e-003  |
| 39 | 1.959e+001 | 4.627e-001 | 4.723e-001 | 9.570e-003  |
| 40 | 2.008e+001 | 4.579e-001 | 4.542e-001 | -3.694e-003 |
| 41 | 2.058e+001 | 4.372e-001 | 4.364e-001 | -7.731e-004 |
| 42 | 2.108e+001 | 4.145e-001 | 4.189e-001 | 4.358e-003  |
| 43 | 2.158e+001 | 3.930e-001 | 4.017e-001 | 8.644e-003  |
| 44 | 2.208e+001 | 3.804e-001 | 3.848e-001 | 4.371e-003  |
| 45 | 2.257e+001 | 3.711e-001 | 3.683e-001 | -2.832e-003 |
| 46 | 2.307e+001 | 3.495e-001 | 3.521e-001 | 2.568e-003  |
| 47 | 2.357e+001 | 3.350e-001 | 3.363e-001 | 1.283e-003  |
| 48 | 2.407e+001 | 3.171e-001 | 3.209e-001 | 3.732e-003  |
| 49 | 2.456e+001 | 3.021e-001 | 3.059e-001 | 3.849e-003  |
| 50 | 2.506e+001 | 2.821e-001 | 2.913e-001 | 9.173e-003  |
| 51 | 2.556e+001 | 2.737e-001 | 2.772e-001 | 3.457e-003  |
| 52 | 2.606e+001 | 2.619e-001 | 2.635e-001 | 1.505e-003  |
| 53 | 2.656e+001 | 2.502e-001 | 2.502e-001 | -7.545e-005 |
| 54 | 2.705e+001 | 2.350e-001 | 2.373e-001 | 2.315e-003  |
| 55 | 2.755e+001 | 2.218e-001 | 2.249e-001 | 3.119e-003  |
| 56 | 2.805e+001 | 2.136e-001 | 2.129e-001 | -6.447e-004 |
| 57 | 2.855e+001 | 1.938e-001 | 2.014e-001 | 7.547e-003  |
| 58 | 2.904e+001 | 1.905e-001 | 1.903e-001 | -2.618e-004 |
| 59 | 2.954e+001 | 1.797e-001 | 1.796e-001 | -1.728e-005 |
| 60 | 3.004e+001 | 1.730e-001 | 1.694e-001 | -3.637e-003 |
| 61 | 3.054e+001 | 1.629e-001 | 1.596e-001 | -3.280e-003 |
| 62 | 3.103e+001 | 1.517e-001 | 1.502e-001 | -1.486e-003 |
| 63 | 3.153e+001 | 1.502e-001 | 1.413e-001 | -8.958e-003 |
| 64 | 3.203e+001 | 1.324e-001 | 1.327e-001 | 2.742e-004  |



## Compound $[\text{Au}_8(\text{S-C}_6\text{H}_4\text{-NO}_2)_8\{(\text{DAB-G1-(PPh}_2)_8\}]$ (18)

INTENSITY fit : Diffusion : Variable Gradient :

$$I=I[0]*\exp(-D*\text{SQR}(2*\text{PI}*\text{gamma}*\text{Gi}*\text{LD})*(\text{BD-LD}/3)*1e4)$$

32 points for Peak 1, Peak Point = 4.151 ppm

Converged after 45 iterations!

Results Comp. 1

$I[0]$  = 1.015e+000  
 Diff Con. = 3.382e-010 m<sup>2</sup>/s  
 Gamma = 4.258e+003 Hz/G  
 Little Delta = 2.000m  
 Big Delta = 197.230m

RSS = 1.226e-003

SD = 6.190e-003

| Point | Gradient   | Expt       | Calc       | Difference  |
|-------|------------|------------|------------|-------------|
| 1     | 6.740e-001 | 9.966e-001 | 1.014e+000 | 1.766e-002  |
| 2     | 1.686e+000 | 1.000e+000 | 1.010e+000 | 9.682e-003  |
| 3     | 2.697e+000 | 9.859e-001 | 1.001e+000 | 1.531e-002  |
| 4     | 3.709e+000 | 9.857e-001 | 9.889e-001 | 3.269e-003  |
| 5     | 4.720e+000 | 9.750e-001 | 9.730e-001 | -1.972e-003 |
| 6     | 5.732e+000 | 9.557e-001 | 9.536e-001 | -2.084e-003 |
| 7     | 6.743e+000 | 9.355e-001 | 9.310e-001 | -4.512e-003 |
| 8     | 7.755e+000 | 9.128e-001 | 9.054e-001 | -7.418e-003 |
| 9     | 8.766e+000 | 8.848e-001 | 8.771e-001 | -7.724e-003 |
| 10    | 9.778e+000 | 8.542e-001 | 8.463e-001 | -7.918e-003 |
| 11    | 1.079e+001 | 8.222e-001 | 8.135e-001 | -8.722e-003 |
| 12    | 1.180e+001 | 7.869e-001 | 7.788e-001 | -8.107e-003 |
| 13    | 1.281e+001 | 7.511e-001 | 7.428e-001 | -8.235e-003 |
| 14    | 1.382e+001 | 7.114e-001 | 7.057e-001 | -5.667e-003 |
| 15    | 1.484e+001 | 6.726e-001 | 6.678e-001 | -4.750e-003 |
| 16    | 1.585e+001 | 6.317e-001 | 6.296e-001 | -2.125e-003 |
| 17    | 1.686e+001 | 5.921e-001 | 5.911e-001 | -9.295e-004 |
| 18    | 1.787e+001 | 5.511e-001 | 5.529e-001 | 1.803e-003  |
| 19    | 1.888e+001 | 5.137e-001 | 5.151e-001 | 1.406e-003  |
| 20    | 1.989e+001 | 4.775e-001 | 4.781e-001 | 5.805e-004  |
| 21    | 2.090e+001 | 4.392e-001 | 4.420e-001 | 2.807e-003  |
| 22    | 2.192e+001 | 4.058e-001 | 4.070e-001 | 1.298e-003  |
| 23    | 2.293e+001 | 3.707e-001 | 3.734e-001 | 2.671e-003  |
| 24    | 2.394e+001 | 3.375e-001 | 3.412e-001 | 3.669e-003  |
| 25    | 2.495e+001 | 3.085e-001 | 3.105e-001 | 2.040e-003  |
| 26    | 2.596e+001 | 2.785e-001 | 2.816e-001 | 3.049e-003  |
| 27    | 2.697e+001 | 2.529e-001 | 2.543e-001 | 1.400e-003  |
| 28    | 2.798e+001 | 2.235e-001 | 2.288e-001 | 5.301e-003  |
| 29    | 2.900e+001 | 2.021e-001 | 2.050e-001 | 2.878e-003  |
| 30    | 3.001e+001 | 1.813e-001 | 1.830e-001 | 1.721e-003  |
| 31    | 3.102e+001 | 1.603e-001 | 1.627e-001 | 2.400e-003  |
| 32    | 3.203e+001 | 1.423e-001 | 1.441e-001 | 1.855e-003  |

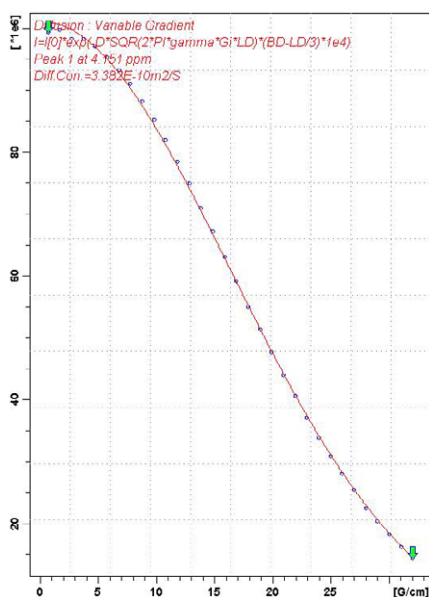

Supplement: b812500g.pdf [file b812500g.pdf]
